# Supplementary material for: The Staphylococcus aureus ArlS Kinase Inhibitor Tilmicosin Has Potent Anti-Biofilm Activity in Both Static and Flow Conditions
Source: Microorganisms. 2024 Jan 25;12(2):256. doi: 10.3390/microorganisms12020256 (PMC10891534; doi:10.3390/microorganisms12020256)
Supplement: Supplementary file 1 [file microorganisms-12-00256-s001.zip › Table S1.pdf]

**Table S1. Primers used in this study**

| Primers                                                                     | Sequences (5'-3')                                    | Restriction Site |
|-----------------------------------------------------------------------------|------------------------------------------------------|------------------|
| <b>For construction of the promoter-GFP reporter plasmids</b>               |                                                      |                  |
| SA- <i>spx</i> -P2-pro-F                                                    | CTC <u>GCTAGC</u> GTGTAGAACTTATCTGAAAAATTAGG         | NheI             |
| SA- <i>spx</i> -P2-pro-R                                                    | CTC <u>GGATCC</u> TCATTGCTTAAAATTTAGTTATAGATCA<br>AG | BamHI            |
| SA- <i>mgrA</i> -P2-pro-F                                                   | CAC <u>GCTAGC</u> GATCGCAACAAACACAACC                | NheI             |
| SA- <i>mgrA</i> -P2-pro-R                                                   | CAC <u>GGATCC</u> GTTACTGACACATTATATTAGTGA           | BamHI            |
| <b>For construction of the <i>arlRS</i> complementation plasmids</b>        |                                                      |                  |
| SA- <i>arlRSc</i> -R                                                        | GTT <u>GGATCC</u> TGACTTTGATTGACGTCTCAGT             | BamHI            |
| SA- <i>arlRSc</i> -F                                                        | GTT <u>GTCGAC</u> TGTGTGAAATGTTTAAACTACGGT           | Sall             |
| <b>For expression of the recombinant cytoplasmic domain of ArlS protein</b> |                                                      |                  |
| arlSHK-F                                                                    | TCG <u>GGATCC</u> ATTCGACGAGATGGTTTTTC               | BamHI            |
| arlSHK-R                                                                    | TCG <u>CTCGAG</u> TAAAATATGATTTTAAACGTTGTTTCCT       | XhoI             |
